# Supplementary material for: Si doped highly crystalline mesoporous In2O3nanowires: synthesis, characterization and ultra-high response to NOxat room temperature
Source: Royal Society of Chemistry journal article supplement (doi:10.1039/c4ra14354j), 2015-01-01
Supplement: c4ra14354j1.pdf [file c4ra14354j1.pdf]

## Si doped highly crystal mesoporous In<sub>2</sub>O<sub>3</sub> nanowires: synthesis, characterization and ultra-high response to NO<sub>x</sub> at room temperature

Liyuan Yao<sup>a</sup>, Kan Kan<sup>a,c</sup>, Yufei Lin<sup>a</sup>, Jiabao Song<sup>a</sup>, Jingchao Wang<sup>a</sup>, Jun Gao<sup>a</sup>, Peikang Shen<sup>d</sup>, Li Li<sup>\*a,b</sup> and Keying Shi<sup>\*a</sup>

<sup>a</sup> Key Laboratory of Functional Inorganic Material Chemistry, Ministry of Education, School of Chemistry and Materials Science, Heilongjiang University, Harbin, 150080, P. R. China.

<sup>b</sup> Key Laboratory of Chemical Engineering Process & Technology for High-efficiency Conversion, School of Chemistry and Materials Science, Heilongjiang University, Harbin 150080, P. R. China.

<sup>c</sup> Institute of Advanced Technology, Heilongjiang Academy of Sciences, Harbin 150000, P. R. China.

<sup>d</sup> Department of Physics and Engineering Sun Yat-sen University, Guangzhou, 510275, P. R. China.

E-mail: shikeying2008@163.com; lwjjhlju@sina.cn; Fax: +86 4518667 3647; Tel: +86 451 8660 9141

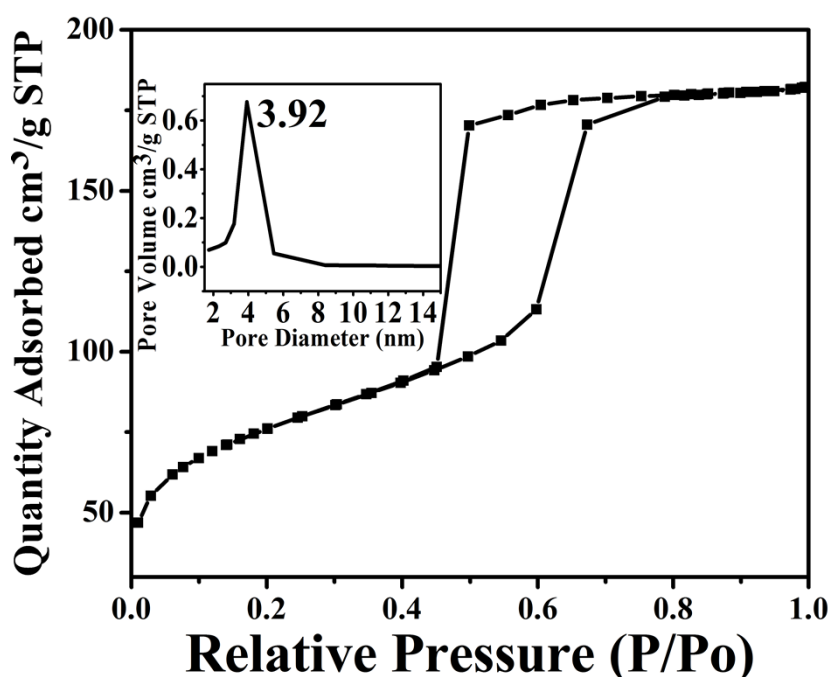

Fig. S1. BET specific surface areas of SBA-16 (BET: 270.99 m<sup>2</sup>/g; the pore size is 3.92nm).

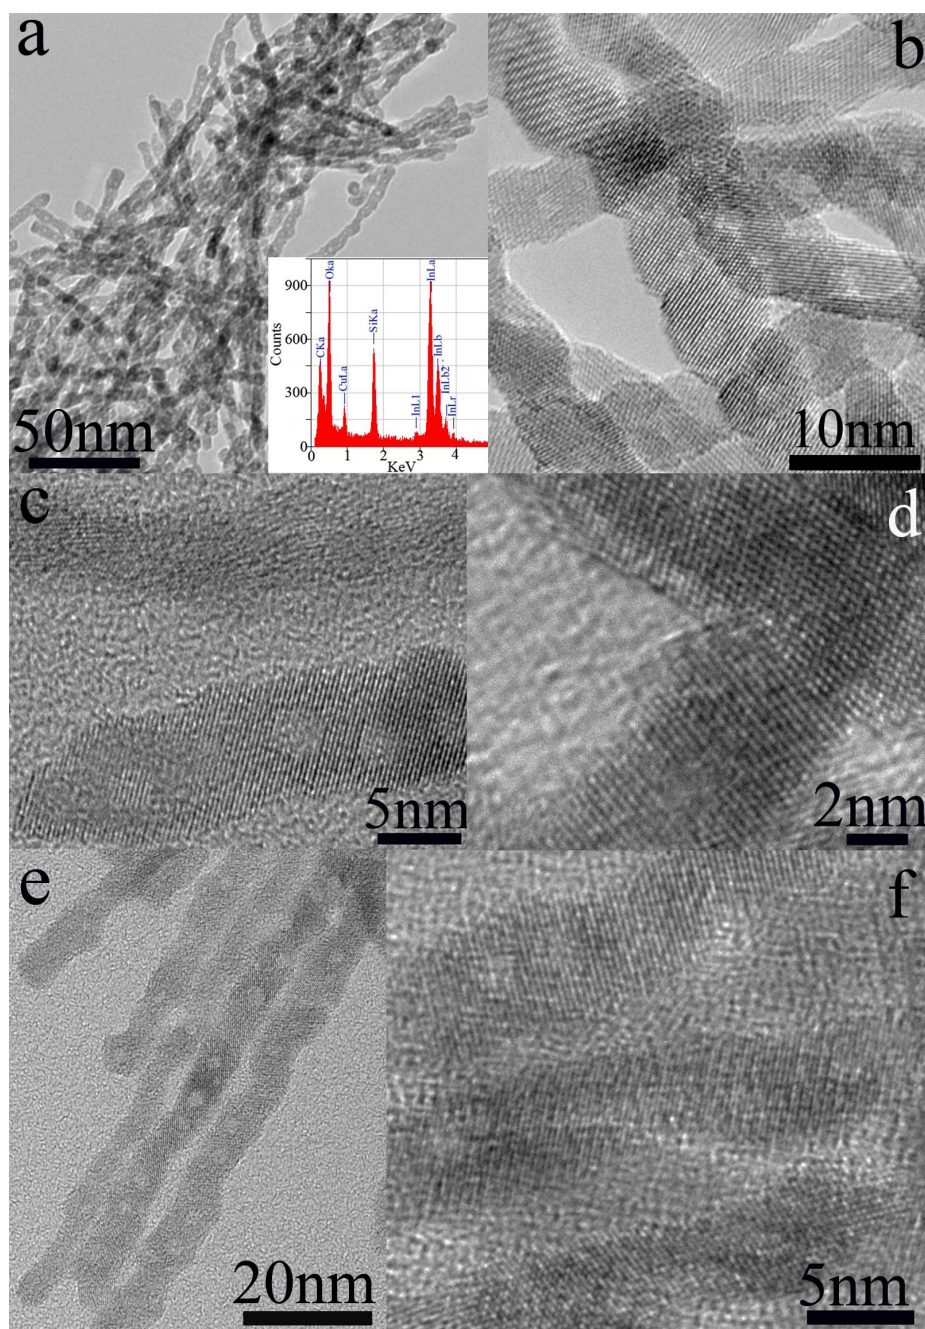

Fig. S2. TEM/HRTEM images of  $\text{In}_2\text{O}_3$  NWs doped by amorphous silica samples.

(a)~(f) INW-2, and (f) is the HRTEM image of Fig.3e.

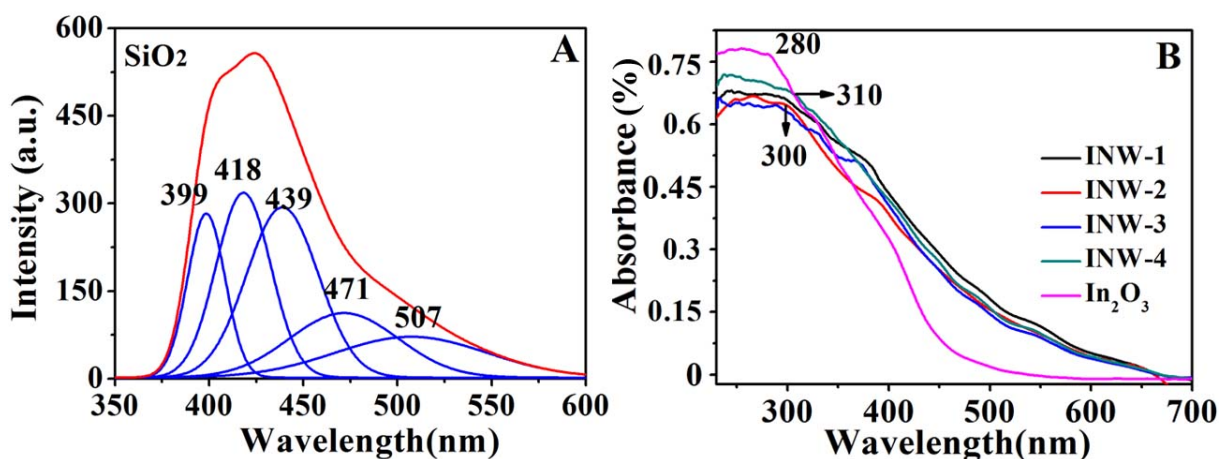

Fig. S3. PL spectra of (A) SiO<sub>2</sub> (SBA-16) with 325 nm excitation at room temperature of and (B) UV-vis diffuse absorption spectra of SiO<sub>2</sub>-In<sub>2</sub>O<sub>3</sub> composites with different atomic ratios.

Fig.S3A is PL spectra of SiO<sub>2</sub> (SBA-16) with 325 nm excitation at room temperature. In Figure.S3B, the absorption edge around 550 nm was pure In<sub>2</sub>O<sub>3</sub> NWs. The absorption edges observed to be around 675 nm were In<sub>2</sub>O<sub>3</sub> NWs doped by amorphous silica samples (INW-1, INW-2, INW-3 and INW-4). Besides, it was denoted that the absorption in UV light region decreased for pure In<sub>2</sub>O<sub>3</sub> NWs compared with In<sub>2</sub>O<sub>3</sub> NWs doped by amorphous silica. This demonstrated that the coverage of SiO<sub>2</sub> on In<sub>2</sub>O<sub>3</sub> surface did not restrain the absorption of UV light. This was different from previous studies<sup>1</sup> about the SiO<sub>2</sub>-coated TiO<sub>2</sub> (the average thickness of SiO<sub>2</sub> coating layer was 2-3 nm).

Furthermore, In<sub>2</sub>O<sub>3</sub> NWs doped by amorphous silica samples (HCMIAAs) with a high aspect ratio and peculiar morphologies should favor the existence of large quantities of oxygen vacancies, which would induce the formation of new energy levels in the band gap. The UV absorption of HCMIAAs occurred at 300-310 nm indicating that the existence of weak quantum confinement effect<sup>2</sup>.

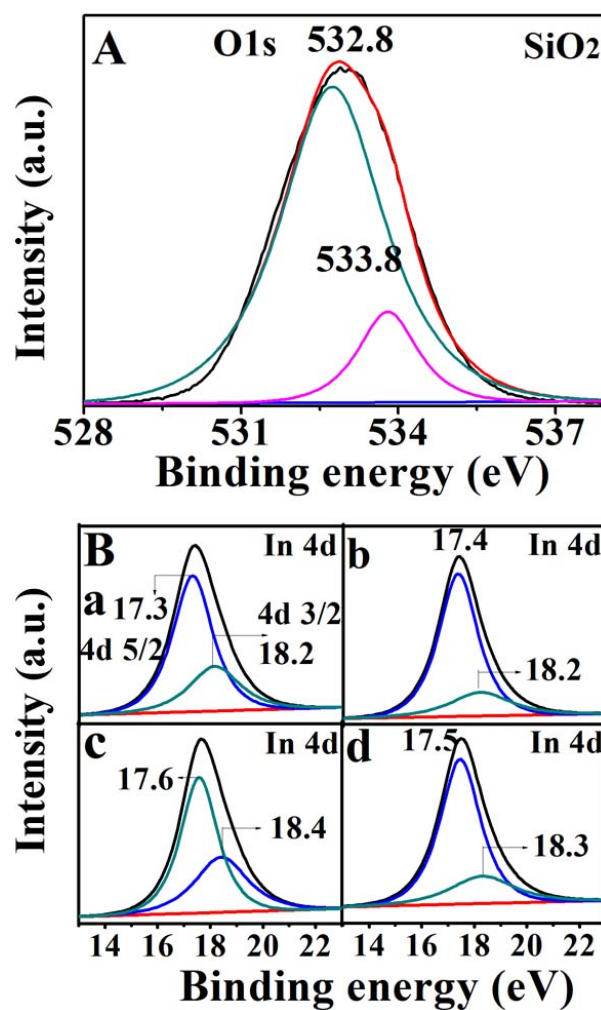

Fig. S4. XPS spectra of (A) O1s of SiO<sub>2</sub> (SBA-16) and (B) low binding energy region in XPS of samples containing valence band in In4d (a) In<sub>2</sub>O<sub>3</sub>, (b) INW-1, (c) INW-2 and (d) INW-4, respectively.

Fig. S4A showed the O1s spectra of pure SiO<sub>2</sub> (SBA-16) located at 532.8 eV were essentially composed one of a major component, which could be attributed to Si-O binding energy<sup>3</sup>. The spectra depicted a secondary component, which located at higher energy (533.8 eV) and could be ascribed to O-H groups linked to Si cations.

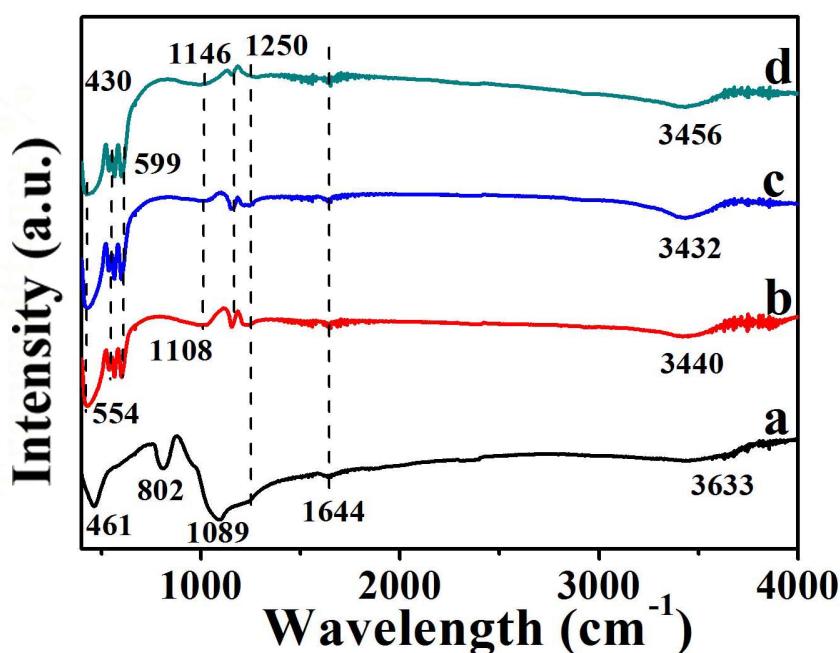

Fig. S5 FT-IR spectra of (a) SiO<sub>2</sub>, (b) INW-1, (c) INW-2 and (d) INW-4, respectively.

FT-IR spectra of SiO<sub>2</sub>, INW-1, INW-2 and INW-4 samples were shown in Fig. S5. As shown in Fig. S5, there were adsorptive peaks of amorphous silica hydroxyl at 3432-3633 cm<sup>-1</sup> and the spectrum should be attributed to the stretching of hydrogen (-OH) bond of H<sub>2</sub>O<sup>4</sup>. The spectra of INW-1 and INW-2 appeared blue shifted to 3432 cm<sup>-1</sup>, and red shifted in INW-4. Moreover, the peak appeared at 1644 cm<sup>-1</sup> and 461 cm<sup>-1</sup> were assigned to the bending vibrations of (-OH) bond and Si-O group<sup>5</sup> respectively. Furthermore, 1089 cm<sup>-1</sup> was symmetric stretching of Si-O-Si group whereas 802 cm<sup>-1</sup> was asymmetric stretching of Si-O-Si group. According to previous studies<sup>6-7</sup>, the band centered at 1108 cm<sup>-1</sup> was assigned to the stretching vibration of Si-O-metal<sup>5</sup>, that was Si-O-In stretching vibration. 500 cm<sup>-1</sup> absorption could be attributed to the vibrations of In-O bond<sup>6</sup>. So, the absorptions in 554 cm<sup>-1</sup> and 599 cm<sup>-1</sup> and 430 cm<sup>-1</sup> were assigned to the stretching vibration of In-O<sup>7-9</sup>, respectively. In-O bond in plane bending vibrations should be appeared at 410 cm<sup>-1</sup>. Comparing with the references, the adsorptive peaks shifted in Fig. S 5(b-d) might be affected by Si-O-In.

Tab. S1 Comparison of the response-recovery results of (A) response and (B) response time of mesoporous INW composited NFs thin film sensor with different atomic ratios to NO<sub>x</sub> (RH: 42 %)

| Volume concentration<br>(ppm) |                 | 97.0  | 48.5  | <b>29.1</b>  | <b>9.70</b>  | 4.85  | 2.91  | 0.97  |
|-------------------------------|-----------------|-------|-------|--------------|--------------|-------|-------|-------|
| INW-1                         | Response        | 39.56 | 40.42 | 53.33        | 23.16        | 4.63  | 4.06  | -     |
|                               | Response time/s | 196   | 292.7 | 295.3        | 308          | 48    | 60.7  | -     |
| INW-2                         | Response        | 115.6 | 94.7  | <b>41.64</b> | <b>39.18</b> | 30.62 | 9.54  | 1.68  |
|                               | Response time/s | 118   | 109   | 108          | 151          | 330.7 | 309.3 | 194.7 |
| INW-3                         | Response        | 17.39 | 13.6  | 7.07         | 2.8          | -     | -     | -     |
|                               | Response time/s | 18    | 70    | 127          | 103          | -     | -     | -     |
| INW-4                         | Response        | 1.43  | 1.81  | 1.15         | 1.51         | -     | -     | -     |
|                               | Response time/s | 64    | 92    | 133.5        | 63           | -     | -     | -     |

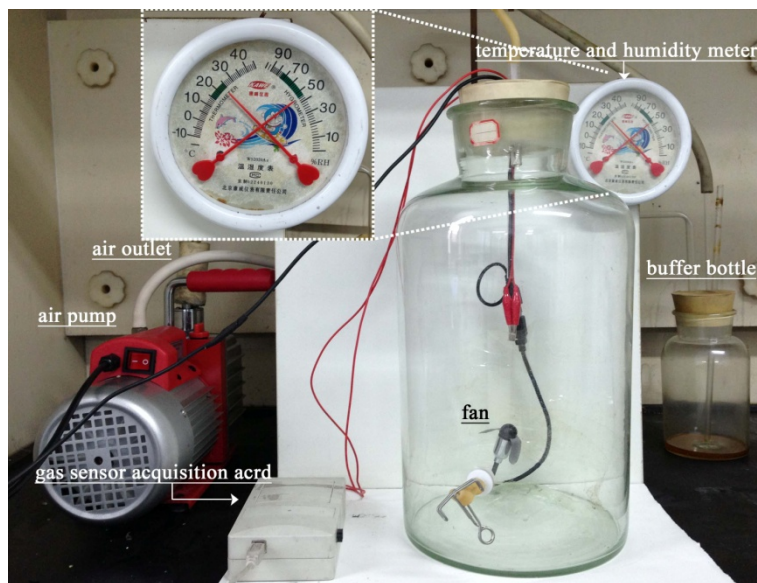

Fig. S6 Images of the gas sensing test device

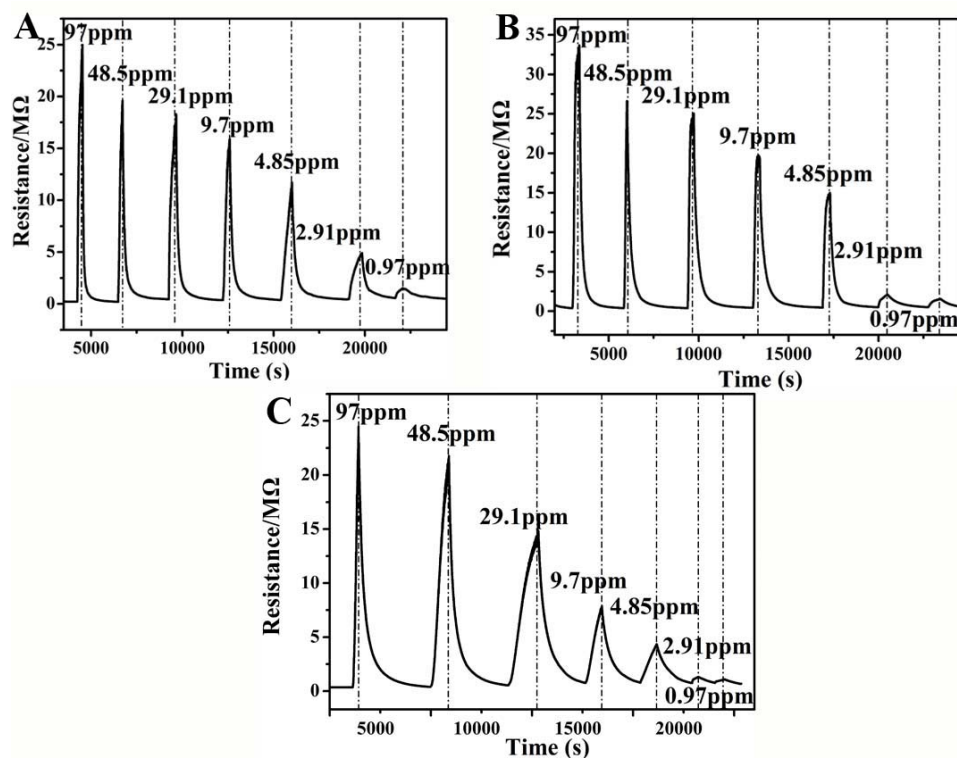

Fig S7. Response-recovery curves of the INW-2 sensor to 97ppm-0.97ppm at room temperature in the different RH (A) 42%, (B) 61% and (C) 80%.

Tab.S2 The gas response of the INW-2 sensor to 97ppm-0.97ppm NO<sub>x</sub> at room temperature, the RH range of 42-80%.

| C/ppm                 | 97.0  | 48.5 | 29.1  | 9.7   | 4.85  | 2.91 | 0.97 |
|-----------------------|-------|------|-------|-------|-------|------|------|
| Gas Reponse at 42% RH | 115.6 | 94.7 | 41.64 | 39.18 | 30.62 | 9.54 | 1.68 |
| Gas Reponse at 61% RH | 110.8 | 90.6 | 38.7  | 35.1  | 30.7  | 8.48 | 1.39 |
| Gas Reponse at 80% RH | 93.7  | 85.4 | 35.5  | 31.6  | 28.6  | 4.41 | 0.77 |

**Table S3.** The gas sensing properties of similar detection methods

| Metal Oxide                         | Optimal Mixing ratio        | Morphology  | Optimal Temperature (°C) | Response/ ppm<br>S C |      | Reference                                      |
|-------------------------------------|-----------------------------|-------------|--------------------------|----------------------|------|------------------------------------------------|
| In <sub>2</sub> O <sub>3</sub>      | Ta (2.3at. %)               | Film        | 400                      | 3.81                 | 0.08 | Chem.Mater, 24(2012), 2864-2871                |
| In <sub>2</sub> O <sub>3</sub>      | SnO <sub>2</sub> (0.1 mol%) | Powders     | 250                      | 2906                 | 10   | Sens. Actuators, B. 151(2010),265-273          |
| In <sub>2</sub> O <sub>3</sub>      | -                           | Nanosheet   | 250                      | 164                  | 50   | Sens. Actuators, B. 208(2015),436-443          |
| Fe-In <sub>2</sub> O <sub>3</sub>   | Fe (0.05wt. %)              | Powders     | 100                      | 117                  | 1    | Sens. Actuators, B. 191(2014),806-812          |
| In <sub>2</sub> O <sub>3</sub>      | -                           | Microsphere | 200                      | 10                   | 1    | Sens. Actuators, B. 187(2013),495-502          |
| In <sub>2</sub> O <sub>3</sub>      | -                           | Particles   | 275                      | 8                    | 1    | Electron.Mater.Lett. 10(2014),509-513          |
| In <sub>2</sub> O <sub>3</sub> /rGO | GO (0.5wt. %)               | Composites  | RT                       | 0.25                 | 1    | Acs Appl.Mater.Interfaces. 6(2014),21093-21100 |
| In <sub>2</sub> O <sub>3</sub>      | -                           | Nanowire    | 150                      | 50                   | 10   | Appl.Phys.A 85(2006),241-246                   |
| Zn- In <sub>2</sub> O <sub>3</sub>  | In:Zn (7:1)                 | Flower-like | 300                      | 27.4                 | 5    | Rsc.Adv., 4(2014),15161-15170                  |
| In <sub>2</sub> O <sub>3</sub>      | -                           | Microsphere | 80                       | 323.5                | 0.5  | Rsc.Adv., 5(2015),4609-4614                    |
| In <sub>2</sub> O <sub>3</sub>      | -                           | Nanoplates  | 150                      | 73                   | 1    | Rsc.Adv., 4(2014),4831-4835                    |
| In <sub>2</sub> O <sub>3</sub>      | -                           | Mesoporous  | 100                      | 37.8                 | 5    | Sens. Actuators, B. 187(2013),484-494          |
| In <sub>2</sub> O <sub>3</sub>      | -                           | Slice-like  | 250                      | 1.5                  | 5    | Sens. Actuators, B. 176(2013),258-263          |

## References

1. H. Sakai, T. Kanda, H. Shibata, T. Ohkubo and M. Abe, *Journal of the American Chemical Society*, 2006, **128**, 4944.
2. G. Liu, *Int. J. Electrochem. Sci*, 2011, **6**, 2162.

3. S. Permpoon, G. Berthomé, B. Baroux, J. C. Joud and M. Langlet, *Journal of materials science*, 2006, **41**, 7650.
4. Z. Hou, C. Zhang, C. Li, Z. Xu, Z. Cheng, G. Li, W. Wang, C. Peng and J. Lin, *Chemistry-A European Journal*, 2010, **16**, 14513.
5. X. Hou, H. Ding, Y. Zheng and M. Wang, *Materials Research Innovations*, 2013, **17**, S234-S239.
6. MakramA.Fakhri. Sarmad Fawzi Hamza. *The Iraqi Journal For Mechanical And Material Engineering*, 2013, **13**, 120.
7. M. Jothibas, C. Manoharan, S. Ramalingam, S. Dhanapandian, S. Johnson Jeyakumar and M. Bououdina, *Journal of Molecular Structure*, 2013, **1049**, 239.
8. A. Singhal, K. Dubey, Y. Bhardwaj, D. Jain, S. Choudhury and A. Tyagi, *RSC Advances*, 2013, **3**, 20913.
9. P. Innocenzi, G. Brusatin, S. Licoccia, M. L. Di Vona, F. Babonneau and B. Alonso, *Chemistry of Materials*, 2003, **15**, 4790.
